# Supplementary material for: Professional content analysis and quality assessment of ovarian cancer related videos on social media platforms: A comparative study of YouTube, Bilibili, TikTok, and Kwai
Source: Research Square preprint supplement (doi:10.21203/rs.3.rs-8544008/v1), 2026-01-22
Supplement: Supplementary file 1 [file a51f30826d6d8720c98e34f8.xlsx]

## Sheet: Table S3
Table S3 Quality comparison between the videos uploaded by professionals and non-professionals
	Professionals (N=257)			Non-Professionals (N=63)
Scores	M	Min-Max	P25-P75	M	Min-Max	P25-P75	P
GQS	4	1-5	3-5	2	1-5	2-3	<0.0001a
VIQI-sum	15	6-20	12-17	11	4-18	9-12.5	<0.0001a
VIQI-1	4	1-5	3-5	3	1-5	2-4	<0.0001a
VIQI-2	4	1-5	3-5	3	1-5	2-3	<0.0001a
VIQI-3	3	1-5	2-3	2	1-4	2-2	<0.0001a
VIQI-4	4	1-5	3-4	3	1-5	2-4	<0.0001a
mDISCERN-sum	3	0-5	2-4	2	0-4	1-2	<0.0001a
PEMAT-U	0.69	0.15-0.92	0.54-0.77	0.46	0-0.77	0.38-0.54	<0.0001a
PEMAT-A	0.5	0-1	0.33-0.75	0.33	0-1	0.25-0.5	<0.001a
mDISCERN-1	243 (94.6%)			42 (66.7%)			<0.0001c
mDISCERN-2	228 (88.7%)			9 (14.3%)			<0.0001c
mDISCERN-3	190 (73.9%)			34 (54.0%)			<0.01c
mDISCERN-4	101 (39.3%)			12 (19.0%)			<0.01c
mDISCERN-5	39 (15.2%)			15 (23.8%)			0.13c
a: Mann-Whitney U b: Fisher's exact test c: Pearson chi-square test
