# Supplementary material for: Professional content analysis and quality assessment of ovarian cancer related videos on social media platforms: A comparative study of YouTube, Bilibili, TikTok, and Kwai
Source: Research Square preprint supplement (doi:10.21203/rs.3.rs-8544008/v1), 2026-01-22
Supplement: Supplementary file 2 [file b957c455b7ba8b7b14c5f7b2.xlsx]

## Sheet: Table S1
Table S1 Categorization of videos about cervical cancer on YouTube/TikTok/Bilibili/Kwai
Topic	YouTube(N=82)	TikTok(N=86)	Bilibili(N=70)	Kwai(N=82)	P_overall	P_Y-T	P_Y-B	P_Y-K	P_T-B	P_T-K	P_B-K
Anatomy	5 (6.10%)	1 (1.16%)	1 (1.43%)	2 (2.44%)	0.28b	0.11c	0.22c	0.44c	1c	0.61c	1c
Etiology/Prevention	4 (4.88%)	19 (22.09%)	8 (11.43%)	5 (6.10%)	<0.01a	<0.01c	0.23c	1c	0.09c	<0.01c	0.26c
Pathology	4 (4.88%)	14 (16.28%)	7 (10.00%)	5 (6.10%)	<0.05a	<0.05c	0.35c	1c	0.35c	0.05c	0.55c
Epidemiology	4 (4.88%)	7 (8.14%)	4 (5.71%)	14 (17.07%)	<0.05a	0.54c	1c	<0.05c	0.76c	0.1c	<0.05c
Symptoms	23 (28.05%)	10 (11.63%)	6 (8.57%)	9 (10.98%)	<0.01a	<0.05c	<0.01c	<0.01c	0.6c	1c	0.79c
Examination/Diagnosis	20 (24.39%)	8 (9.30%)	8 (11.43%)	0 (0.00%)	<0.001a	<0.05c	0.06c	<0.001c	0.79c	<0.01c	<0.01c
Treatment	22 (26.83%)	18 (20.93%)	29 (41.43%)	23 (28.05%)	<0.05a	0.47c	0.06c	1c	<0.01c	0.37c	0.09c
Prognosis	0 (0.00%)	9 (10.47%)	7 (10.00%)	24 (29.27%)	<0.001a	<0.01c	<0.01c	<0.001c	1c	<0.01c	<0.01c
Pairwise comparisons: P_Y-T, P_Y-B, P_Y-K, P_T-B, P_T-K, P_B-K
a: Pearson Chi-squared test b: Fisher-Freeman-Halton c: Fisher's exact test
