# Supplementary material for: Professional content analysis and quality assessment of ovarian cancer related videos on social media platforms: A comparative study of YouTube, Bilibili, TikTok, and Kwai
Source: Research Square preprint supplement (doi:10.21203/rs.3.rs-8544008/v1), 2026-01-22
Supplement: Supplementary file 3 [file e5633eafa1456dd2c15db634.xlsx]

## Sheet: Sheet1
Table S2 Quality assessment of videos about cervical cancer on YouTube, TikTok, Bilibili, Kwai
Scores	YouTube_M	YouTube_MinMax	YouTube_P25P75	TikTok_M	TikTok_MinMax	TikTok_P25P75	Bilibili_M	Bilibili_MinMax	Bilibili_P25P75	Kwai_M	Kwai_MinMax	Kwai_P25P75	P_overall	P_Y-T	P_Y-B	P_Y-K	P_T-B	P_T-K	P_B-K
GQS	4	2–5	3–5	3	1–5	2–3	3	1–5	3–4	4	1–5	2–5	<0.001a	<0.001b	<0.001b	<0.01b	<0.01b	<0.001b	0.12b
VIQI-sum	15	8–20	12–17	13	6–19	11–14	13	8–20	11–16.75	15	4–20	12–17	<0.001a	<0.001b	<0.05b	0.68b	<0.05b	<0.001b	0.21b
VIQI-1	5	2–5	4–5	3	1–5	3–4	3.5	2–5	3–4	4	1–5	4–5	<0.001a	<0.001b	<0.001b	0.34b	<0.01b	<0.001b	<0.001b
VIQI-2	4	2–5	3–5	4	1–5	3–4	3	2–5	3–4.75	4	1–5	3–5	<0.05a	<0.01b	0.09b	0.96b	0.65b	<0.05b	0.19b
VIQI-3	3	2–5	2–3	2	1–4	2–3	3	2–5	2–3	3	1–5	2–3	<0.05a	<0.05b	0.91b	0.55b	<0.05b	0.06b	0.78b
VIQI-4	4	2–5	3–4	4	1–5	3–4	4	2–5	3–5	4	1–5	3–4	0.28a	0.09b	0.77b	0.89b	0.1b	0.21b	0.59b
mDISCERN-sum	3	0–4	3–4	2	0–4	2–3	3	0–5	2–4	3	0–4	2–4	<0.001a	<0.001b	<0.001b	0.11b	<0.05b	<0.001b	0.06b
PEMAT-U	0.77	0.23–0.92	0.54–0.77	0.62	0.15–0.92	0.54–0.69	0.62	0.23–0.85	0.46–0.69	0.69	0–0.92	0.54–0.85	<0.01a	0.06b	<0.01b	0.57b	0.38b	<0.05b	<0.01b
PEMAT-A	0.5	0.25–0.75	0.25–0.75	0.67	0.33–1	0.33–0.9175	0.25	0–0.75	0–0.5	0.5	0–0.75	0.5–0.75	<0.001a	<0.05b	<0.001b	0.15b	<0.001b	0.46b	<0.001b
mDISCERN-1	79	(96.3%)		78	(90.7%)		58	(82.9%)		70	(85.4%)		<0.05c	0.21d	<0.01d	<0.05d	0.16d	0.34d	0.82d
mDISCERN-2	70	(85.4%)		64	(74.4%)		46	(65.7%)		57	(69.5%)		<0.05c	0.09d	<0.01d	<0.05d	0.29d	0.5d	0.73d
mDISCERN-3	78	(95.1%)		39	(45.3%)		44	(62.9%)		63	(76.8%)		<0.001c	<0.001d	<0.001d	<0.01d	<0.05d	<0.001d	0.08d
mDISCERN-4	47	(57.3%)		1	(1.2%)		18	(25.7%)		47	(57.3%)		<0.001c	<0.001d	<0.001d	1d	<0.001d	<0.001d	<0.001d
mDISCERN-5	1	(1.2%)		34	(39.5%)		18	(25.7%)		1	(1.2%)		<0.001c	<0.001d	<0.001d	1d	0.09d	<0.001d	<0.001d
Pairwise comparisons: P_Y-T, P_Y-B, P_Y-K, P_T-B, P_T-K, P_B-K
a: Kruskal-Wallis b: Mann-Whitney U c: Pearson Chi-squared test d: Fisher's exact test e: Fisher-Freeman-Halton
